# Supplementary material for: RAP2.4a Is Transported through the Phloem to Regulate Cold and Heat Tolerance in Papaya Tree (Carica papaya cv. Maradol): Implications for Protection Against Abiotic Stress
Source: PubMed Central journal article supplement (PMC5072549; doi:10.1371/journal.pone.0165030), 2016-10-20

Figure S6

Subcellular accumulation patterns of CpRAP proteins fused to GFP in *Nicotiana tabacum* plants

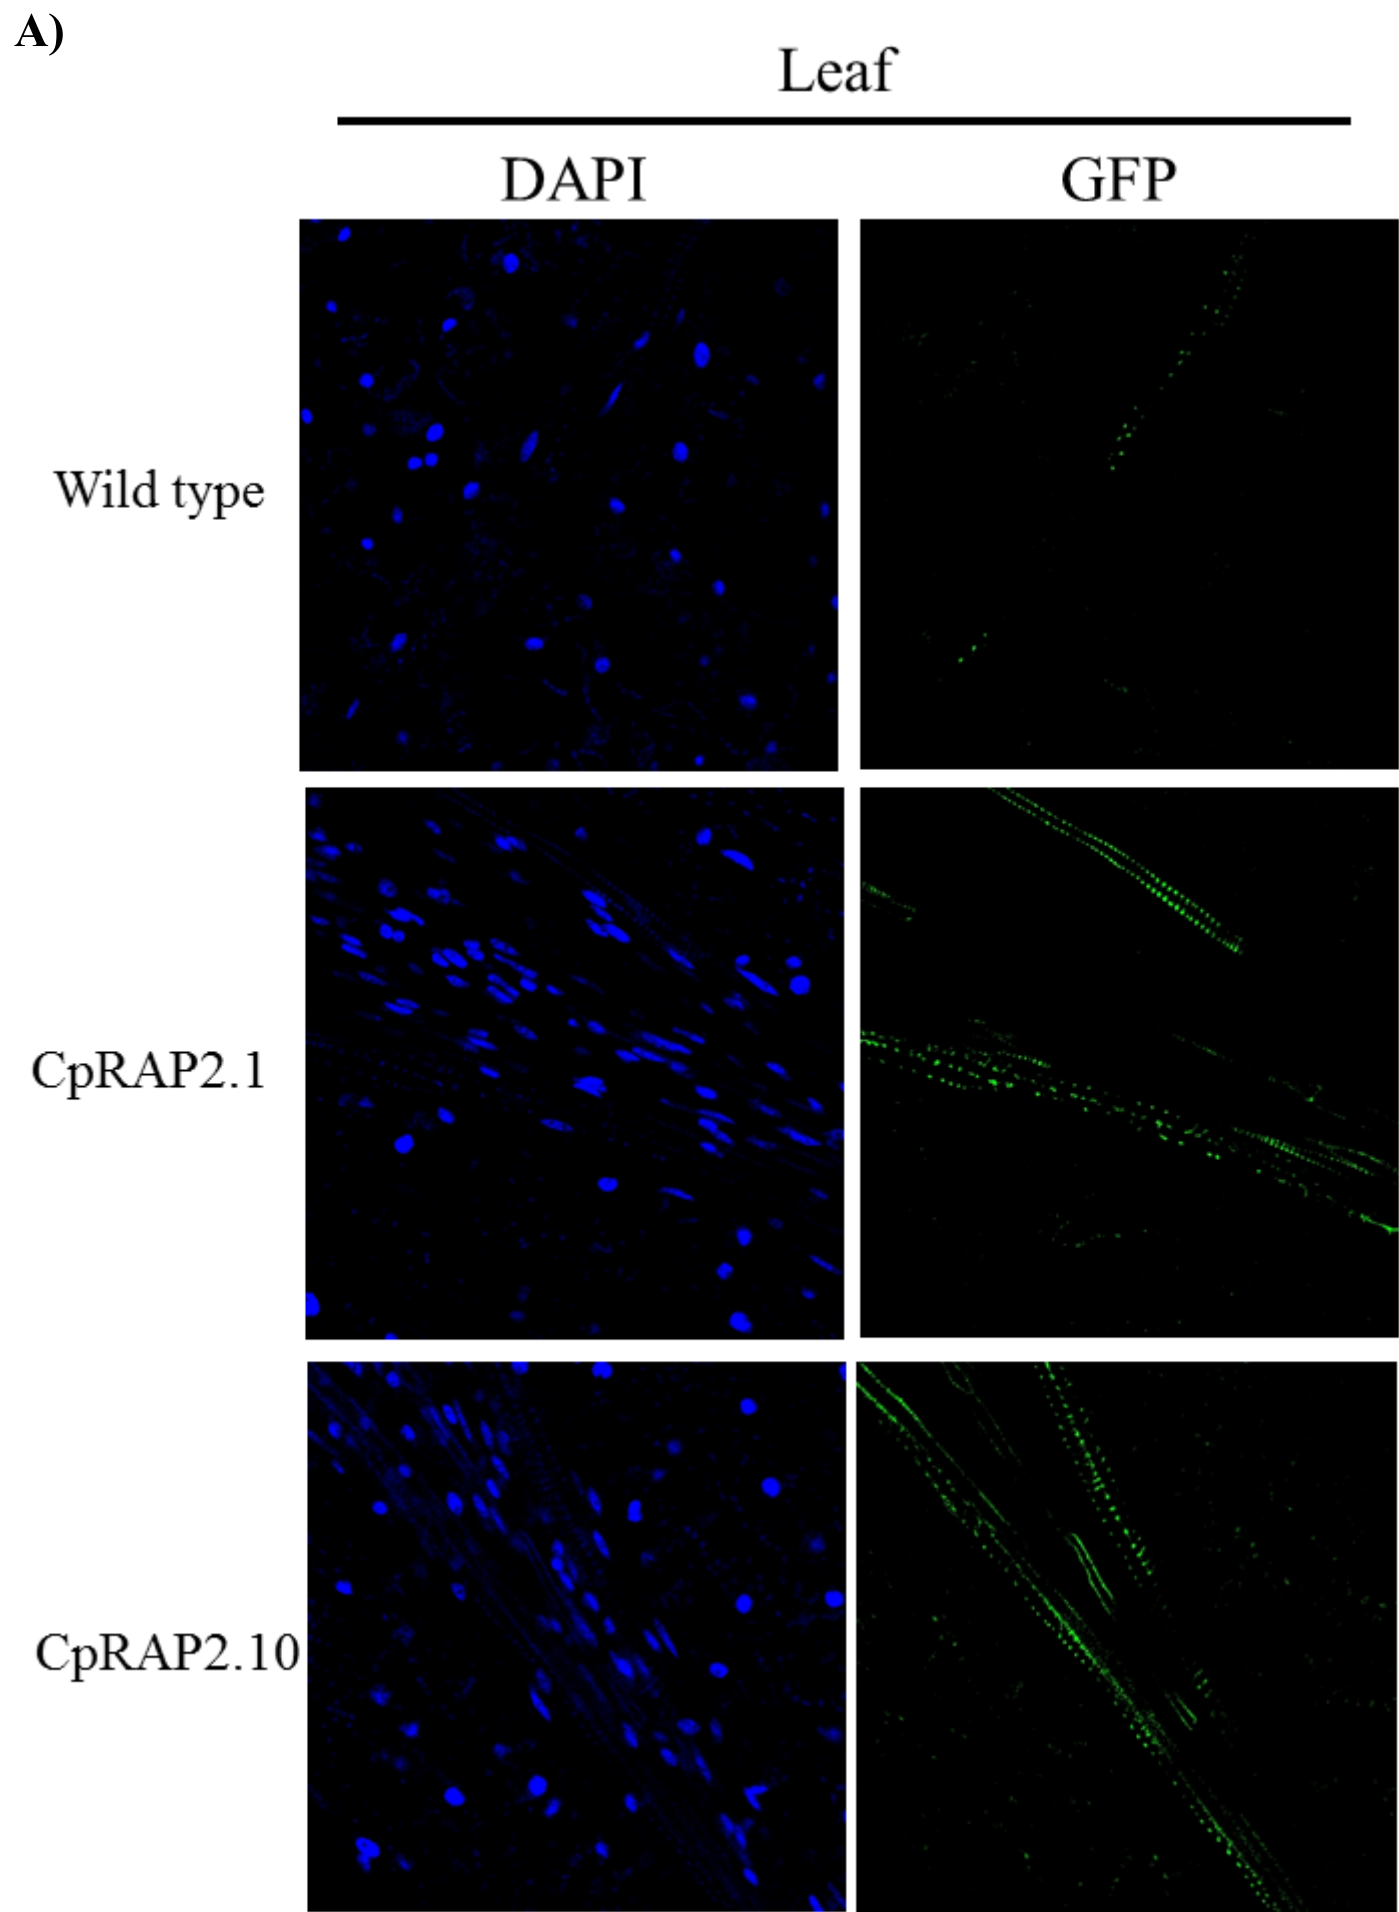

B)

Root

DAPI

GFP

Wild type

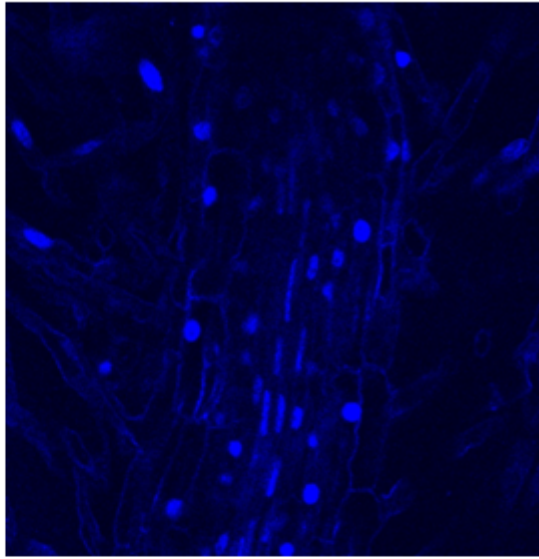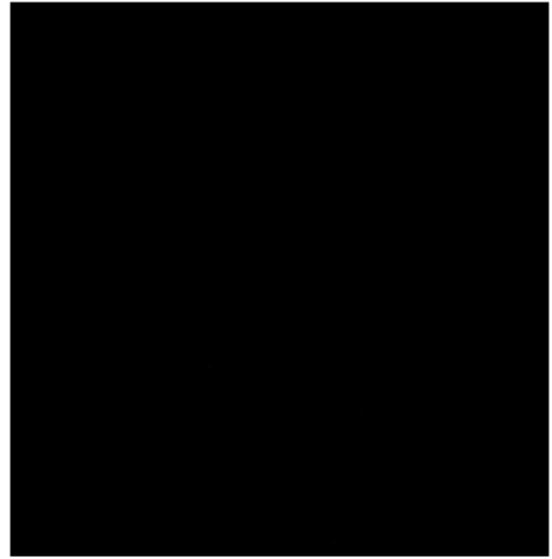

CpRAP2.1

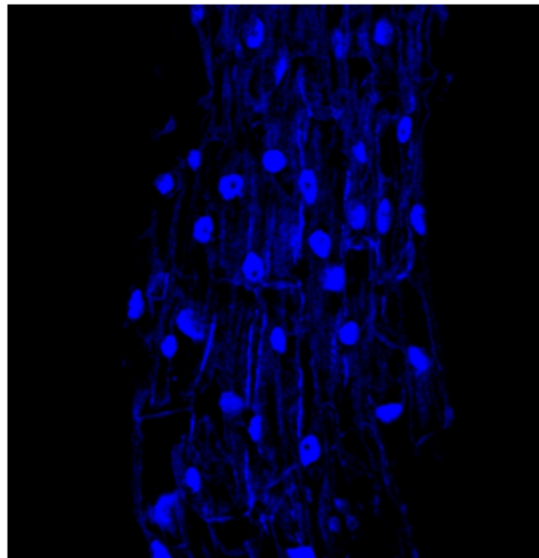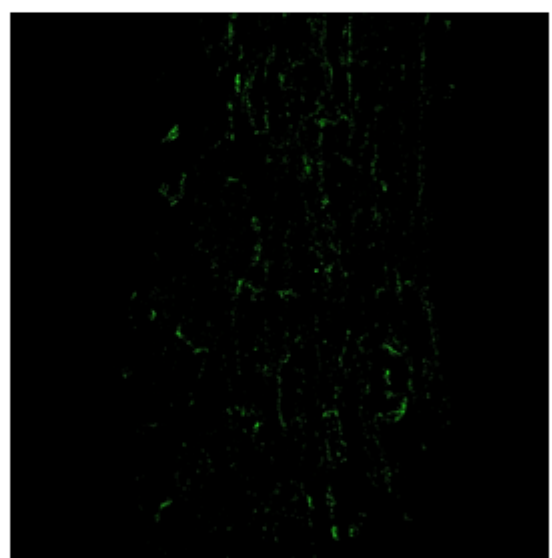

CpRAP2.10

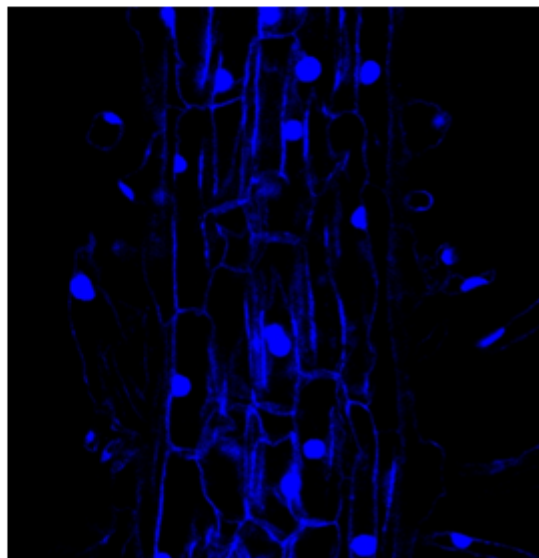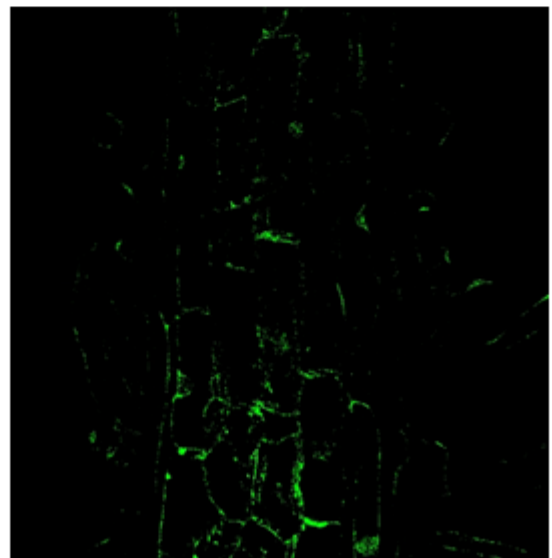

C)

Leaf

DAPI

GFP

CpRAP2.4a

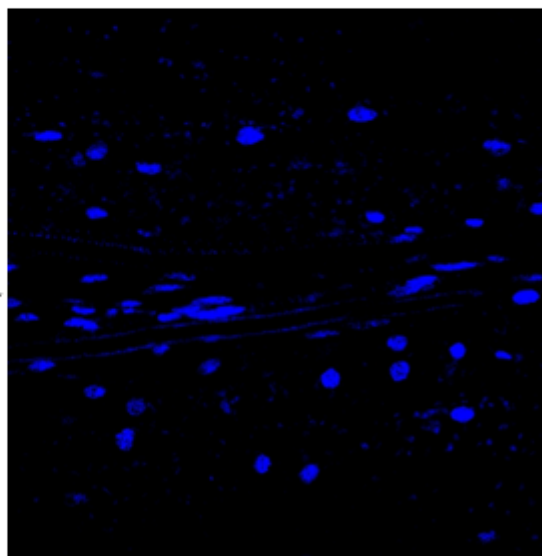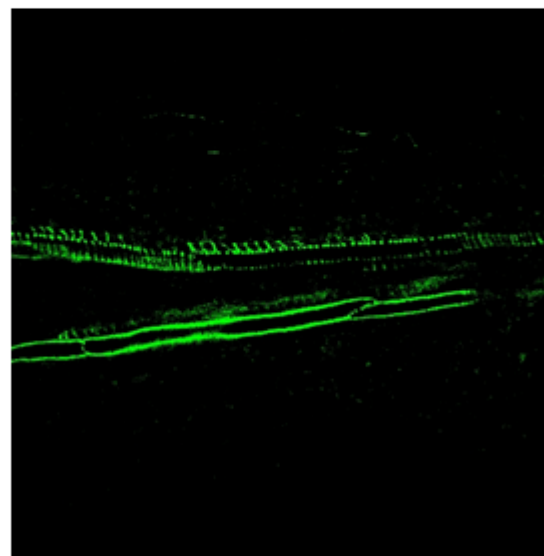

CpRAP2.4b

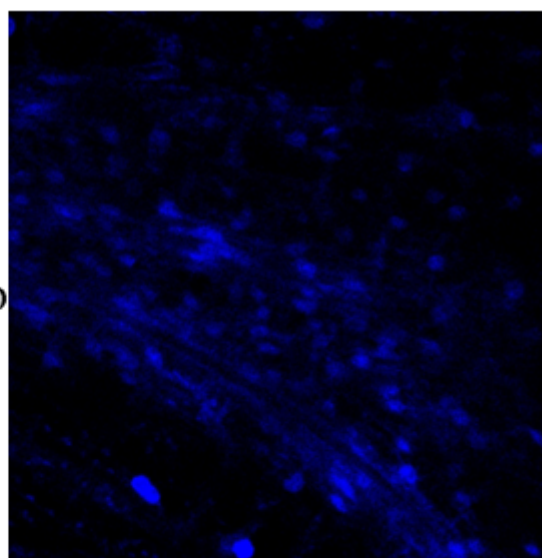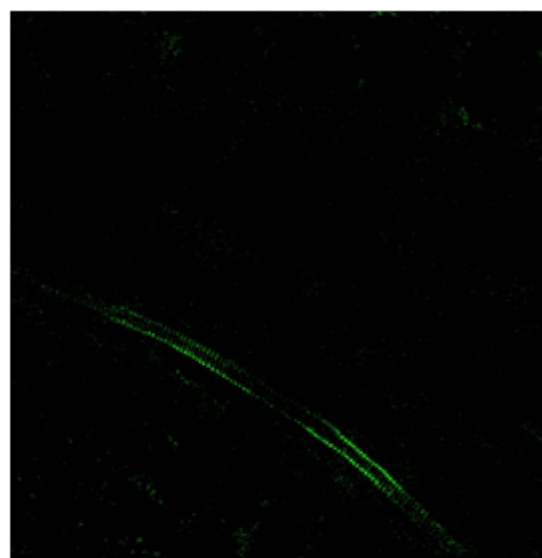

D)

Root

DAPI

GFP

MERGE

CpRAP2.4a

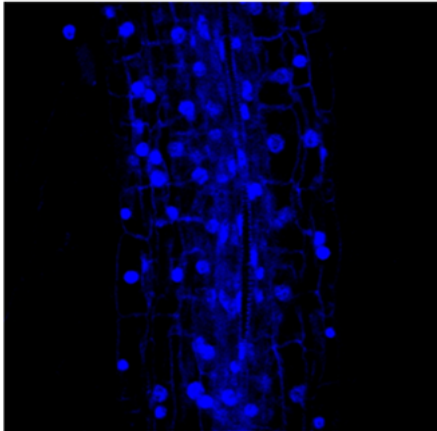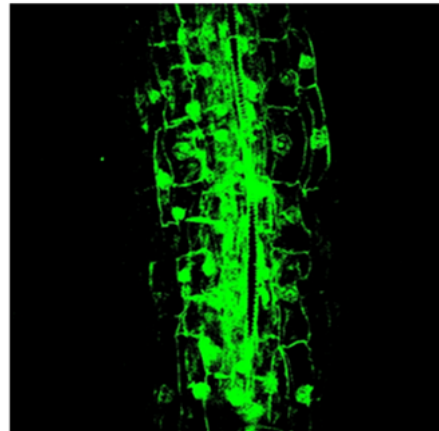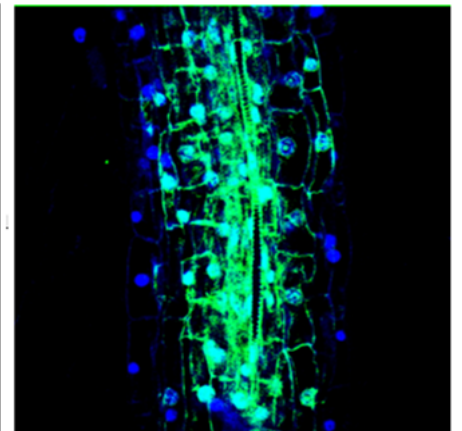

CpRAP2.4b

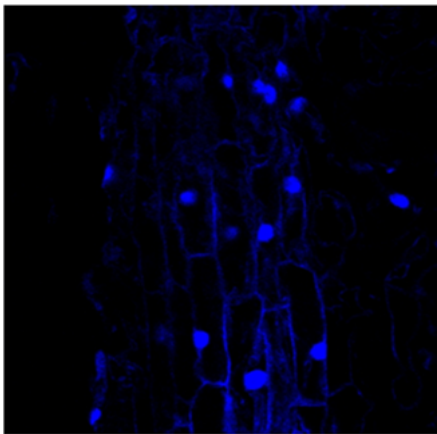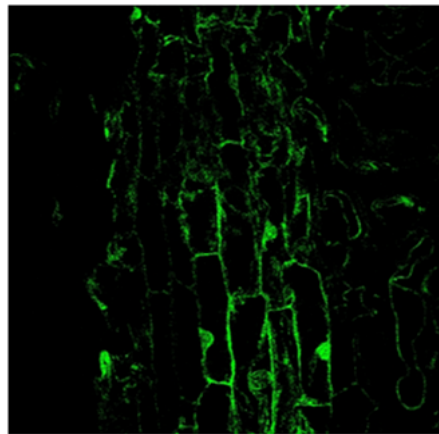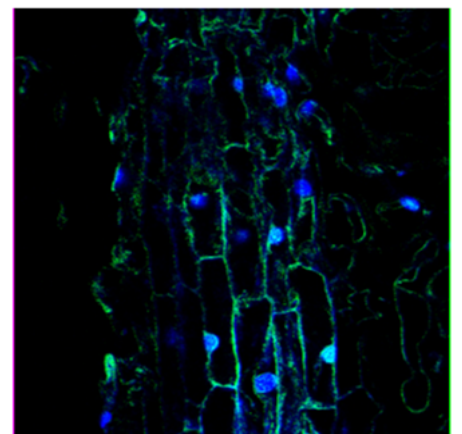

Supplement: pone.0165030.s006.pdf [file pone.0165030.s006.pdf]
