# Supplementary material for: RAP2.4a Is Transported through the Phloem to Regulate Cold and Heat Tolerance in Papaya Tree (Carica papaya cv. Maradol): Implications for Protection Against Abiotic Stress
Source: PubMed Central journal article supplement (PMC5072549; doi:10.1371/journal.pone.0165030), 2016-10-20
Supplement: pone.0165030.s001.pdf [file pone.0165030.s001.pdf]

Figure S1

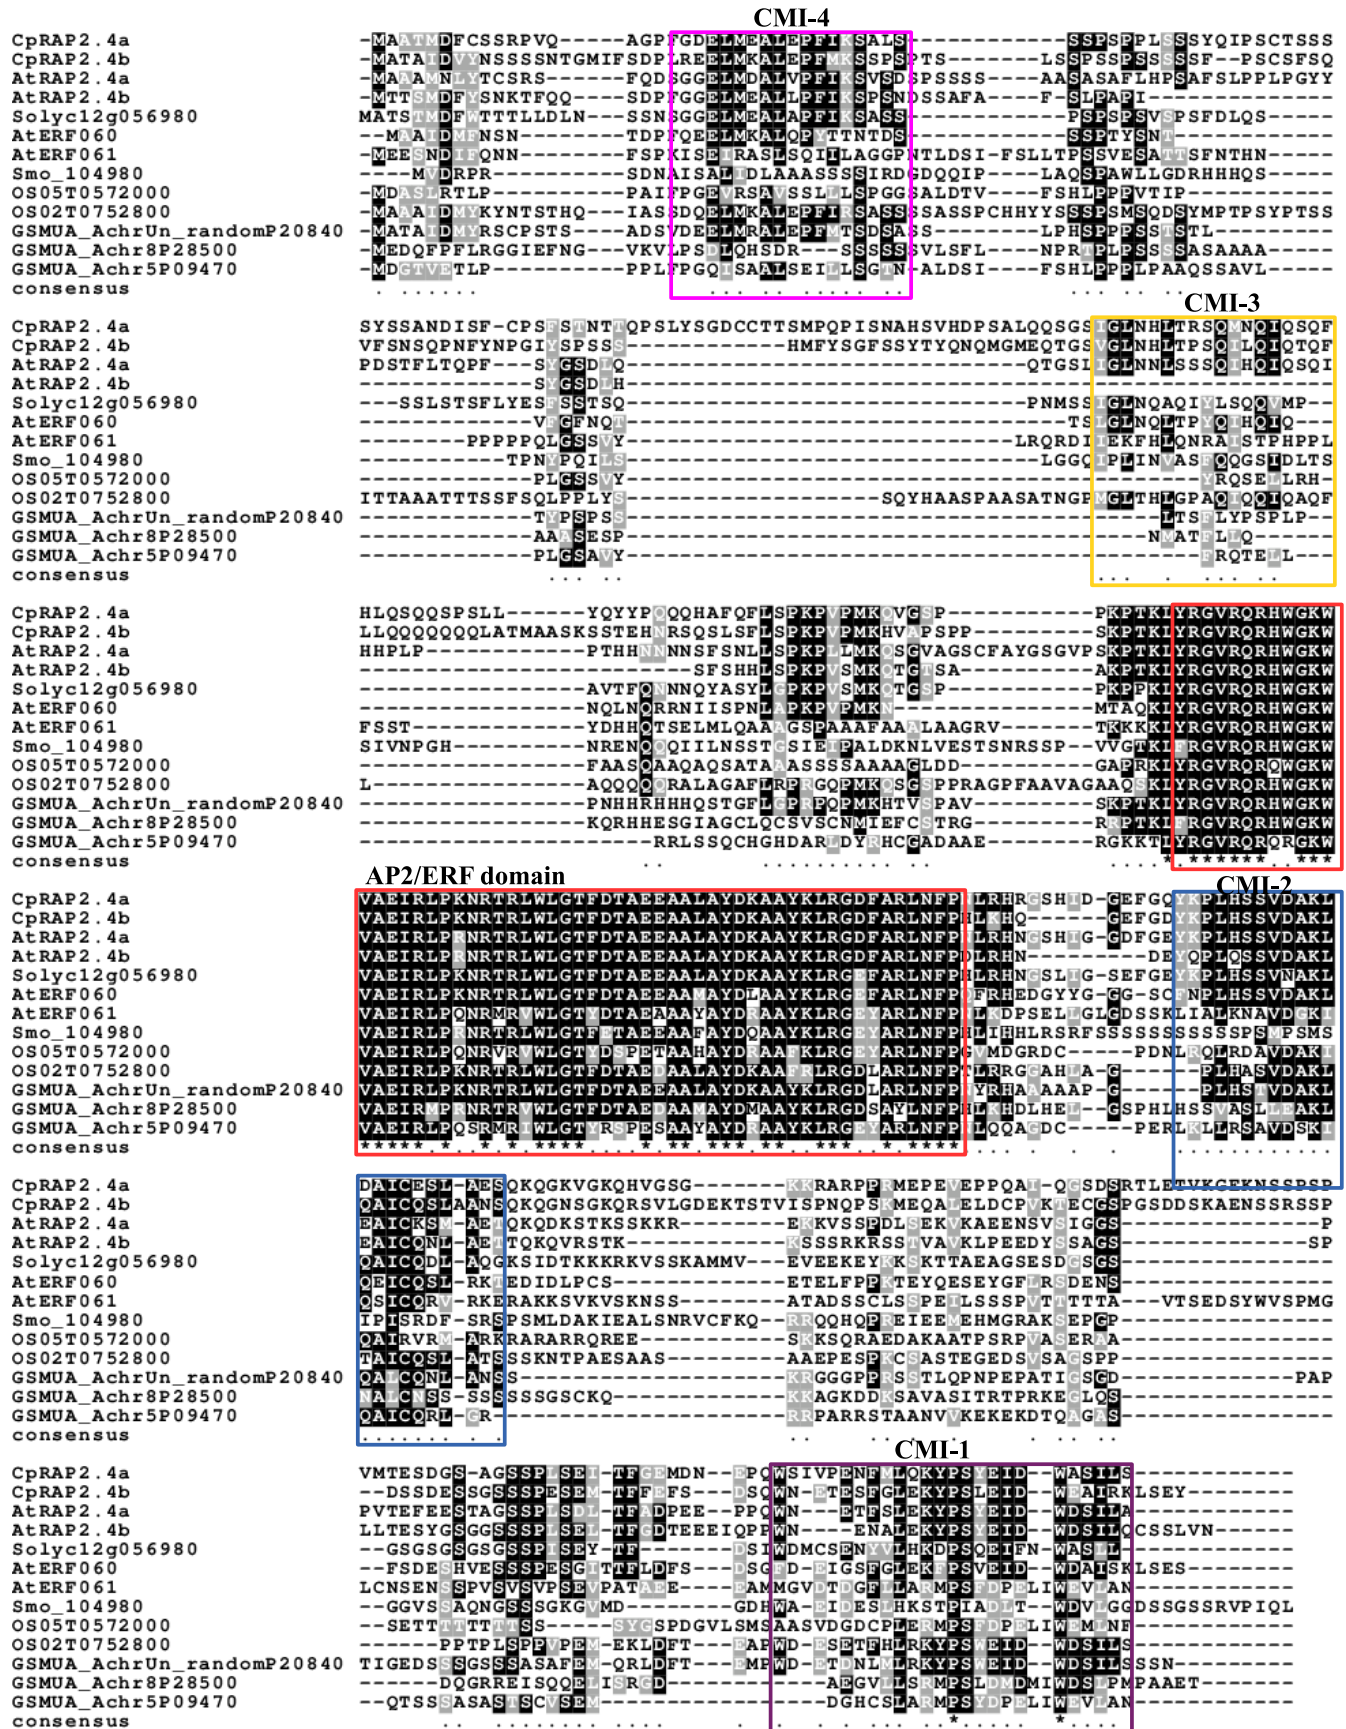

BOXSHADE analysis of the RAP2.4 subgroup belonging to group I of the AP2/ERF transcription factors
