# Supplementary material for: RAP2.4a Is Transported through the Phloem to Regulate Cold and Heat Tolerance in Papaya Tree (Carica papaya cv. Maradol): Implications for Protection Against Abiotic Stress
Source: PubMed Central journal article supplement (PMC5072549; doi:10.1371/journal.pone.0165030), 2016-10-20
Supplement: pone.0165030.s002.pdf [file pone.0165030.s002.pdf]

Figure S2

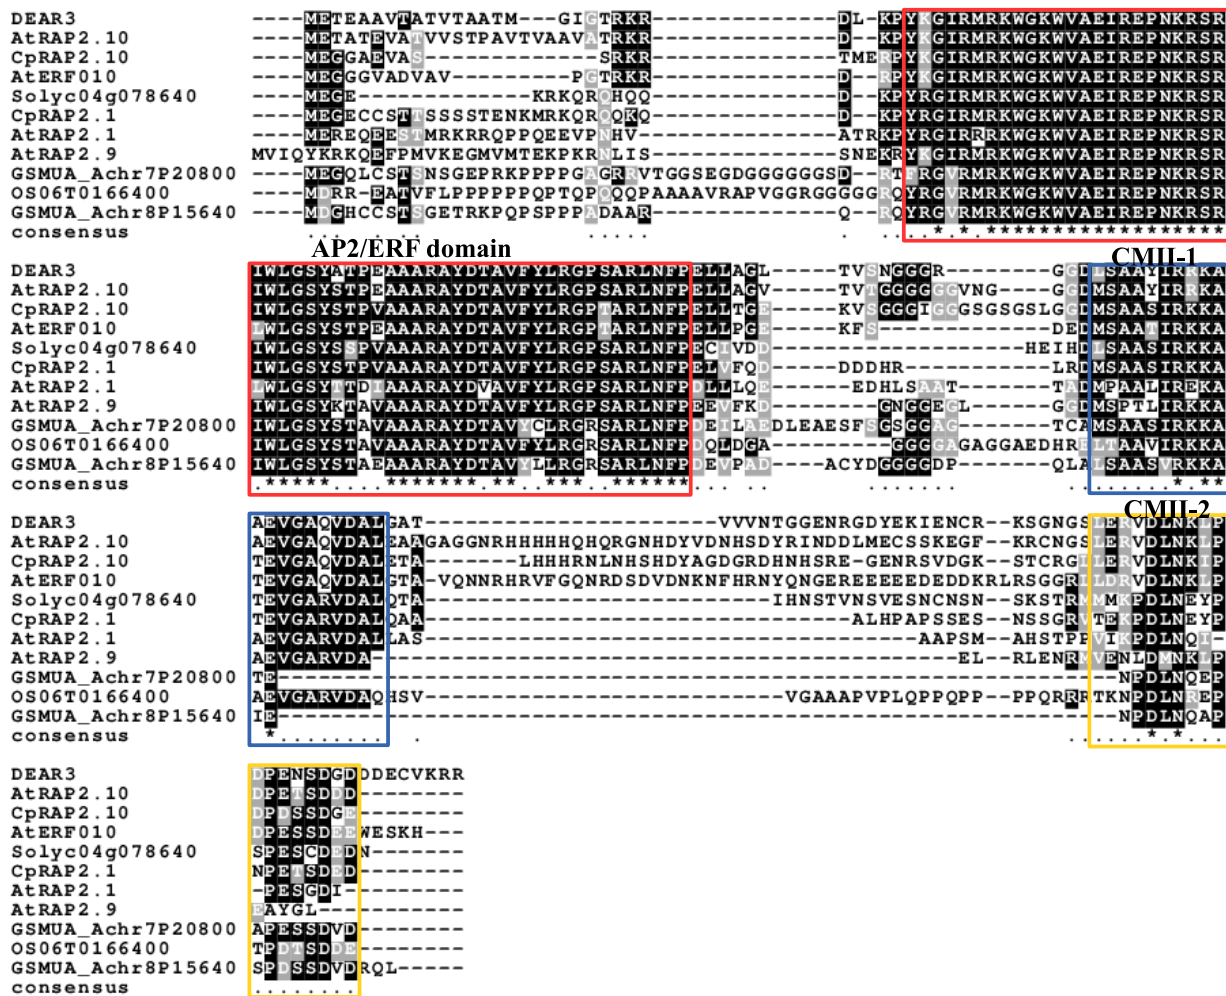

BOXSHADE analysis of the RAP2.1/2.9/2.10 subgroup belonging to group II of the AP2/ERF transcription factors.
