# Supplementary material for: RAP2.4a Is Transported through the Phloem to Regulate Cold and Heat Tolerance in Papaya Tree (Carica papaya cv. Maradol): Implications for Protection Against Abiotic Stress
Source: PubMed Central journal article supplement (PMC5072549; doi:10.1371/journal.pone.0165030), 2016-10-20
Supplement: pone.0165030.s008.pdf [file pone.0165030.s008.pdf]

S1 Table. List of the AP2/ERF TF family in *Carica papaya*.

| Name    | C. papaya ID taq             | Group | Best BLAST and GenBank accession No.                                                                             | E value |
|---------|------------------------------|-------|------------------------------------------------------------------------------------------------------------------|---------|
| CpERF1  | evm.model.supercontig_72.47  | X     | PREDICTED: ethylene-responsive transcription factor ABR1 [ <i>Cucumis melo</i> ], XP_008440983.1                 | 3e-48   |
| CpERF2  | evm.model.supercontig_38.79  | X     | AP2 6l, putative [ <i>Theobroma cacao</i> ], XP_007043782.1                                                      | 2E-057  |
| CpERF3  | evm.model.supercontig_49.94  | X     | AP2 domain-containing transcription factor family protein [ <i>Populus trichocarpa</i> ], XP_002306712.2         | 6E-098  |
| CpERF4  | evm.model.supercontig_83.80  | VIII  | AP2/ERF super family protein [ <i>Hevea brasiliensis</i> ], AFX83939.1                                           | 2E-060  |
| CpERF5  | evm.model.supercontig_89.73  | III   | Integrase-type DNA-binding superfamily protein, putative [ <i>Theobroma cacao</i> ], XP_007039780.1              | 2E-068  |
| CpERF6  | evm.model.supercontig_2304.1 | VII   | AP2/EREBP transcription factor ERF-2 [ <i>Gossypium hirsutum</i> ], AAV51937.1                                   | 4E-075  |
| CpERF7  | evm.model.supercontig_62.11  | X     | hypothetical protein JCGZ_01609 [ <i>Jatropha curcas</i> ], KDP42285.1                                           | 4E-075  |
| CpERF8  | evm.model.supercontig_131.83 | VIII  | ATERF-4/ATERF4/ERF4/RAP2.5 [ <i>Arabidopsis lyrata</i> subsp. <i>Lyrata</i> ], XP_002882920.1                    | 5E-055  |
| CpERF9  | evm.model.supercontig_101.15 | IX    | Ethylene-responsive element binding factor 13, putative [ <i>Theobroma cacao</i> ], XP_007052304.1               | 2E-051  |
| CpERF10 | evm.model.supercontig_27.18  | VIII  | PREDICTED: ethylene-responsive transcription factor 12-like [ <i>Vitis vinifera</i> ], XP_002279760.1            | 5E-070  |
| CpERF11 | evm.model.supercontig_13.175 | X     | unnamed protein product [ <i>Vitis vinifera</i> ], CBI15759.3                                                    | 1E-054  |
| CpERF12 | evm.model.supercontig_27.16  | VIII  | unnamed protein product [ <i>Vitis vinifera</i> ], CBI30599.3                                                    | 1E-059  |
| CpERF13 | evm.model.supercontig_101.39 | III   | PREDICTED: ethylene-responsive transcription factor ERF034-like [ <i>Cicer arietinum</i> ], XP_004510113.1       | 1E-054  |
| CpERF14 | evm.model.supercontig_89.42  | IX    | Ethylene response factor 5, putative [ <i>Theobroma cacao</i> ], XP_007039738.1                                  | 2E-093  |
| CpERF15 | evm.model.supercontig_21.69  | III   | PREDICTED: ethylene-responsive transcription factor ERF021 [ <i>Cucumis melo</i> ], XP_008459604.1               | 3E-075  |
| CpERF16 | evm.model.supercontig_44.73  | IX    | PREDICTED: ethylene-responsive transcription factor ERF098 [ <i>Prunus mume</i> ], XP_008224367.1                | 7E-058  |
| CpERF17 | evm.model.supercontig_12.251 | VIII  | C-repeat binding transcription factor 2 [ <i>Jatropha curcas</i> ], AIC83902.1                                   | 3E-085  |
| CpERF18 | evm.model.supercontig_40.39  | III   | hypothetical protein JCGZ_07297 [ <i>Jatropha curcas</i> ], KDP33726.1                                           | 1E-056  |
| CpERF19 | evm.model.supercontig_481.1  | VII   | Transcription factor JERF1, putative isoform 1 [ <i>Theobroma cacao</i> ], XP_007024746.1                        | 2E-095  |
| CpERF20 | evm.model.supercontig_21.70  | III   | AP2 domain-containing transcription factor family protein [ <i>Populus trichocarpa</i> ], XP_002325520.2         | 2E-067  |
| CpERF21 | evm.model.supercontig_132.31 | VIII  | ethylene response factor ERF4 [ <i>Solanum tuberosum</i> ], AEM63545.1                                           | 5E-063  |
| CpERF22 | evm.model.supercontig_7.269  | III   | Integrase-type DNA-binding superfamily protein [ <i>Theobroma cacao</i> ], XP_007012129.1                        | 2E-068  |
| CpERF23 | evm.model.supercontig_10.113 | V     | DNA binding protein, putative [ <i>Ricinus communis</i> ], XP_002527321.1                                        | 9E-078  |
| CpERF24 | evm.model.supercontig_50.28  | IX    | hypothetical protein JCGZ_17701 [ <i>Jatropha curcas</i> ], KDP26543.1                                           | 1E-046  |
| CpERF25 | evm.model.supercontig_2.277  | VI    | PREDICTED: pathogenesis-related genes transcriptional activator PTI6-like [ <i>Prunus mume</i> ], XP_008240070.1 | 5E-068  |
| CpERF26 | evm.model.supercontig_13.250 | IX    | ethylene responsive element binding factor-like [ <i>Carica papaya</i> ], AGT21474.1                             | 0       |
| CpERF27 | evm.model.supercontig_194.13 | VI    | AP2/ERF domain-containing transcription factor, putative [ <i>Theobroma cacao</i> ], XP_007051632.1              | 2E-088  |
| CpERF28 | evm.model.supercontig_34.132 | I     | ethylene-responsive transcription factor 4 [ <i>Carica papaya</i> ], AFV60736.1                                  | 0       |
| CpERF29 | evm.model.supercontig_7.36   | IX    | hypothetical protein POPTR_0004s05110g [ <i>Populus trichocarpa</i> ],                                           | 2E-089  |

|                      |                              |      |                                                                                                               |        |
|----------------------|------------------------------|------|---------------------------------------------------------------------------------------------------------------|--------|
|                      |                              |      | XP_002305098.1                                                                                                |        |
| CpERF30              | evm.model.supercontig_50.29  | IX   | PREDICTED: ethylene-responsive transcription factor ERF098-like [ <i>Cicer arietinum</i> ], XP_004493770.1    | 2E-031 |
| CpERF31 / CpRAP2.4a  | evm.model.supercontig_36.112 | I    | ethylene-responsive element binding-factor [ <i>Jatropha curcas</i> ], AFY98895.1                             | 9E-133 |
| CpERF32              | evm.model.supercontig_109.32 | III  | hypothetical protein CICLE_v10027587mg [ <i>Citrus clementina</i> ], XP_006426907.1                           | 3E-062 |
| CpERF33 / CpRAP2.4b  | evm.model.supercontig_996.1  | I    | AP2/ERF domain-containing transcription factor, putative [ <i>Theobroma cacao</i> ], XP_007047994.1           | 3E-133 |
| CpERF34              | evm.model.supercontig_151.30 | VII  | hypothetical protein PRUPE_ppa008730mg [ <i>Prunus persica</i> ], XP_007200418.1                              | 2E-103 |
| CpERF35              | evm.model.supercontig_55.155 | X    | PREDICTED: ethylene-responsive transcription factor ERF109 [ <i>Prunus mume</i> ], XP_008236506.1             | 4E-032 |
| CpERF36              | evm.model.supercontig_44.74  | IX   | hypothetical protein PRUPE_ppa018601mg [ <i>Prunus persica</i> ], XP_007224270.1                              | 3E-043 |
| CpERF37 / CpDREB_IV3 | evm.model.supercontig_99.20  | IV   | Dehydration-responsive element-binding protein 2G, putative [ <i>Theobroma cacao</i> ], XP_007017661.1        | 6E-078 |
| CpERF38              | evm.model.supercontig_3.43   | VI   | Ethylene-responsive transcription factor, putative [ <i>Theobroma cacao</i> ], XP_007038942.1                 | 1E-120 |
| CpERF39              | evm.model.supercontig_70.47  | VIII | hypothetical protein JCGZ_26896 [ <i>Jatropha curcas</i> ], KDP41878.1                                        | 4E-068 |
| CpERF40 / CpDREB_IV5 | evm.model.supercontig_1288.2 | IV   | hypothetical protein CISIN_1g038194mg [ <i>Citrus sinensis</i> ], KDO68917.1                                  | 2E-071 |
| CpERF41              | evm.model.supercontig_162.25 | IX   | hypothetical protein PRUPE_ppa016384mg [ <i>Prunus persica</i> ], XP_007206287.1                              | 1E-073 |
| CpERF42              | evm.model.supercontig_122.27 | VI   | Cytokinin response factor 2, putative [ <i>Theobroma cacao</i> ], XP_007040431.1                              | 5E-101 |
| CpERF43              | evm.model.supercontig_127.4  | V    | PREDICTED: ethylene-responsive transcription factor ERF003-like [ <i>Malus domestica</i> ], XP_008377674.1    | 1E-087 |
| CpERF44              | evm.model.supercontig_44.71  | IX   | Ethylene-responsive transcription factor 1B [ <i>Theobroma cacao</i> ], XP_007035093.1                        | 3E-094 |
| CpERF45              | evm.model.supercontig_79.43  | I    | hypothetical protein JCGZ_20463 [ <i>Jatropha curcas</i> ], KDP25307.1                                        | 3E-122 |
| CpERF46              | evm.model.supercontig_10.254 | V    | hypothetical protein CICLE_v10027305mg [ <i>Citrus clementina</i> ], XP_006427266.1                           | 3E-080 |
| CpERF47              | evm.model.supercontig_266.5  | II   | ethylene-responsive transcription factor 2 [ <i>Carica papaya</i> ], AFV60734.1                               | 2E-155 |
| CpERF48              | evm.model.supercontig_13.253 | IX   | ethylene-responsive transcription factor 3 [ <i>Carica papaya</i> ], AFV60735.1                               | 5E-146 |
| CpERF49              | evm.model.supercontig_33.29  | VIII | DORNROSCHEN-like, putative [ <i>Theobroma cacao</i> ], XP_007044810.1                                         | 2E-089 |
| CpERF50              | evm.model.supercontig_10.125 | VIII | PREDICTED: uncharacterized protein LOC101314304 [ <i>Fragaria vesca</i> subsp. <i>Vesca</i> ], XP_004305488.1 | 8E-072 |
| CpERF51              | evm.model.supercontig_101.16 | IX   | hypothetical protein JCGZ_14625 [ <i>Jatropha curcas</i> ], KDP28854.1                                        | 1E-040 |
| CpERF52              | evm.model.supercontig_5.71   | III  | PREDICTED: ethylene-responsive transcription factor ERF024 [ <i>Vitis vinifera</i> ], XP_002283401.2          | 2E-075 |
| CpERF53 / CpDREB_IV4 | evm.model.supercontig_92.16  | IV   | Integrase-type DNA-binding superfamily protein [ <i>Theobroma cacao</i> ], XP_007028832.1                     | 3E-141 |
| CpERF54              | evm.model.supercontig_18.194 | VIII | AP2/ERF domain-containing transcription factor [ <i>Theobroma cacao</i> ], XP_007051933.1                     | 2E-106 |
| CpERF55              | evm.model.supercontig_74.84  | III  | Dehydration-responsive element-binding protein 1F, putative [ <i>Ricinus communis</i> ], XP_002509703.1       | 4E-093 |
| CpERF56 / CpDREB_IV2 | evm.model.supercontig_51.23  | IV   | hypothetical protein CICLE_v10022244mg [ <i>Citrus clementina</i> ], XP_006443285.1                           | 3E-053 |
| CpERF57              | evm.model.supercontig_51.136 | VIII | PREDICTED: ethylene-responsive transcription factor RAP2-11 [ <i>Vitis vinifera</i> ], XP_002281619.1         | 1E-105 |

|                      |                                   |      |                                                                                                               |         |
|----------------------|-----------------------------------|------|---------------------------------------------------------------------------------------------------------------|---------|
| CpERF58              | evm.model.supercontig_16.148      | VIII | hypothetical protein VITISV_003244 [ <i>Vitis vinifera</i> ], CAN78552.1                                      | 3E-078  |
| CpERF59              | evm.model.supercontig_259.2       | V    | PREDICTED: ethylene-responsive transcription factor SHINE 3-like [ <i>Vitis vinifera</i> ], XP_002285107.1    | 2E-076  |
| CpERF60              | evm.model.supercontig_62.63       | VIII | AP2/ERF domain-containing transcription factor, putative [ <i>Theobroma cacao</i> ], XP_007039294.1           | 7E-049  |
| CpERF61 / CpDREB_IV1 | evm.model.supercontig_19.121      | IV   | Dehydration-responsive element-binding protein 2C, putative [ <i>Ricinus communis</i> ], XP_002520794.1       | 6E-110  |
| CpERF62              | evm.model.supercontig_151.29      | VII  | Ethylene responsive transcription factor 2b [ <i>Medicago truncatula</i> ], XP_003591474.1                    | 4E-058  |
| CpERF63              | evm.model.supercontig_14.126      | VIII | WIN1-like protein, putative [ <i>Theobroma cacao</i> ], XP_007032619.1                                        | 8E-125  |
| CpERF64              | evm.model.supercontig_36.41       | II   | AP2 domain-containing transcription factor family protein [ <i>Populus trichocarpa</i> ], XP_006386376.1      | 9E-068  |
| CpERF65              | evm.model.supercontig_5.66        | III  | CBF/DREB1 transcription factor 1 [ <i>Carica papaya</i> ], AFV15809.1                                         | 3E-127e |
| CpERF66              | evm.model.supercontig_91.71       | II   | ethylene-responsive transcription factor ERF015 [ <i>Arabidopsis thaliana</i> ], NP_567867.1                  | 3E-069  |
| CpERF67              | evm.model.supercontig_74.86       | III  | ethylene-responsive transcription factor 1 [ <i>Carica papaya</i> ], AFV60733.1                               | 5E-153  |
| CpERF68              | evm.model.supercontig_13.83       | VIII | hypothetical protein RCOM_1618730 [ <i>Ricinus communis</i> ], XP_002512003.1                                 | 1E-048  |
| CpERF69              | evm.model.supercontig_151.27      | VII  | uncharacterized protein LOC100780763 [ <i>Glycine max</i> ], NP_001241446.1                                   | 2E-069  |
| CpERF70              | evm.model.supercontig_21.63       | II   | Integrase-type DNA-binding superfamily protein, putative [ <i>Theobroma cacao</i> ], XP_007019844.1           | 4E-051  |
| CpERF71 / CpDREB_IV6 | evm.model.supercontig_5.232       | IV   | hypothetical protein PHAVU_008G092800g [ <i>Phaseolus vulgaris</i> ], XP_007140202.1                          | 3E-045  |
| CpERF72              | evm.model.supercontig_71.10       | I    | c-repeat binding transcription factor 2 [ <i>Jatropha curcas</i> ], AIC83902.1                                | 2E-042  |
| CpERF73              | evm.model.supercontig_1.178       | X    | Integrase-type DNA-binding superfamily protein, putative isoform 1 [ <i>Theobroma cacao</i> ], XP_007046241.1 | 2E-092  |
| CpERF74              | evm.model.supercontig_20.67       | III  | CRT/DRE binding factor 1 [ <i>Morus alba</i> var. <i>Multicaulis</i> ], AFQ59977.1                            | 2E-080  |
| CpERF75              | evm.model.supercontig_7.130       | VI   | hypothetical protein POPTR_0002s24750g [ <i>Populus trichocarpa</i> ], XP_006386876.1                         | 3E-100  |
| CpERF76              | evm.model.supercontig_21.106      | XI   | hypothetical protein POPTR_0002s24750g [ <i>Populus trichocarpa</i> ], XP_006386876.1                         | 3E-100  |
| CpERF77              | evm.model.supercontig_7.129       | VI   | Integrase-type DNA-binding superfamily protein [ <i>Theobroma cacao</i> ], XP_007028893.1                     | 4E-035  |
| CpERF78              | evm.model.supercontig_224.4       | XI   | hypothetical protein JCGZ_21099 [ <i>Jatropha curcas</i> ], KDP26066.1                                        | 0       |
| CpERF79 / CpRAP2.1   | Supercontig_21<br>1671823-1672296 | II   | ERF/AP2 domain-containing transcription factor [ <i>Manihot esculenta</i> ], AGC51783.1                       | 2E-073  |
| CpERF80 / CpRAP2.10  | Supercontig_55<br>674943-675488   | II   | PREDICTED: ethylene-responsive transcription factor RAP2-10-like [ <i>Brassica rapa</i> ], CDY62224.1         | 1E-065  |
