# Supplementary material for: RAP2.4a Is Transported through the Phloem to Regulate Cold and Heat Tolerance in Papaya Tree (Carica papaya cv. Maradol): Implications for Protection Against Abiotic Stress
Source: PubMed Central journal article supplement (PMC5072549; doi:10.1371/journal.pone.0165030), 2016-10-20
Supplement: pone.0165030.s009.pdf [file pone.0165030.s009.pdf]

Table S2

## Normalized value of RT-PCR from Figure 2

| 4° C |      |      |      |      | 40° C |      |     |      |      |
|------|------|------|------|------|-------|------|-----|------|------|
| 100  | 52   | 57   | 185  | 253  | 100   | 73   | 554 | 447  | 139  |
| 100  | 153  | 304  | 239  | 184  | 100   | 368  | 424 | 490  | 216  |
| 100  | 162  | 233  | 293  | 236  | 100   | 164  | 271 | 501  | 563  |
| 100  | 143  | 171  | 164  | 155  | 100   | 114  | 125 | 122  | 138  |
| 100  | 1337 | 1237 | 1622 | 1757 | 100   | 384  | 443 | 343  | 244  |
| 100  | 131  | 154  | 150  | 173  | 100   | 319  | 248 | 286  | 229  |
| 100  | 101  | 105  | 98   | 105  | 100   | 116  | 121 | 125  | 124  |
| 100  | 940  | 757  | 1507 | 1121 | 100   | 253  | 950 | 1219 | 77   |
| 100  | 275  | 149  | 161  | 193  | 100   | 382  | 370 | 372  | 280  |
| 100  | 235  | 204  | 245  | 161  | 100   | 215  | 296 | 525  | 1063 |
| 100  | 902  | 916  | 925  | 530  | 100   | 590  | 614 | 713  | 642  |
| 100  | 512  | 355  | 424  | 401  | 100   | 1012 | 978 | 1081 | 880  |
| 100  | 154  | 138  | 140  | 57   | 100   | 214  | 201 | 225  | 272  |
| 100  | 103  | 105  | 107  | 108  | 100   | 79   | 85  | 85   | 82   |
| 100  | 48   | 108  | 108  | 129  | 100   | 121  | 104 | 109  | 121  |
| 100  | 198  | 188  | 216  | 155  | 100   | 418  | 369 | 345  | 176  |
| 100  | 116  | 143  | 135  | 134  | 100   | 103  | 119 | 158  | 192  |
| 100  | 155  | 141  | 160  | 167  | 100   | 168  | 155 | 161  | 148  |
| 100  | 183  | 136  | 166  | 170  | 100   | 168  | 169 | 141  | 184  |
| 100  | 185  | 165  | 176  | 189  | 100   | 326  | 259 | 295  | 248  |
| 100  | 108  | 113  | 117  | 110  | 100   | 120  | 121 | 122  | 126  |
